# Supplementary material
Source: MDPI journal article supplement (https://www.mdpi.com/1996-1073/16/7/3071)
Supplement: s1 [file s1]

## Supplementary data

Representative figure for the nuclear magnetic resonance analysis of synthesized samples is given in the Figure S1.

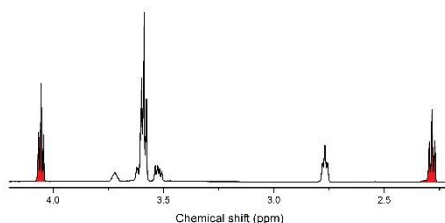

**Figure S1.** Conversion determination via nuclear magnetic resonance – integration of the areas under the signals at around 2.3 and 4.0 ppm.

When all 29 experiments are considered, the following results are obtained using the Response Surface Methodology, with an empirical quadratic model whose equation is:

$$\text{Conversion} = 93.2 + 1.58333A + 1.58333B + 22.8333C + 5.5D + 1.5AB - 7.25AC - 4.5AD - 4.25BC - 2BD - 5CD - 3.30833A^2 + 1.19167B^2 - 18.1833C^2 - 2.43333D^2 \quad (\text{S1})$$

the  $R^2$ -value obtained with this model was 0.97.

**Table S1.** Part of ANOVA for quadratic model.

| Source     | Sum of Squares | Degrees of freedom | Mean Squares | F-value | Probability $p$ |
|------------|----------------|--------------------|--------------|---------|-----------------|
| Model      | 9460.38        | 14                 | 675.74       | 27.63   | < 0.0001        |
| A          | 30.08          | 1                  | 30.08        | 1.23    | 0.2861          |
| B          | 30.08          | 1                  | 30.08        | 1.23    | 0.2861          |
| C          | 6256.33        | 1                  | 6256.33      | 255.82  | < 0.0001        |
| D          | 363.00         | 1                  | 363.00       | 14.84   | 0.0018          |
| Residual   | 342.38         | 14                 | 24.46        |         |                 |
| Cor. Total | 9802.76        | 28                 |              |         |                 |

Diagnostics for the model simulated and the graphs obtained are given below (Figure S2–S6).

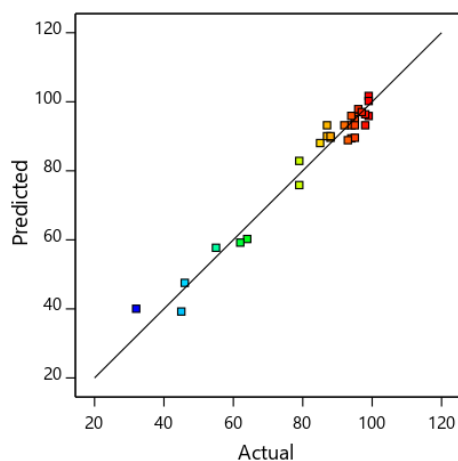

**Figure S2.** Comparison of calculated and experimentally determined conversion values.

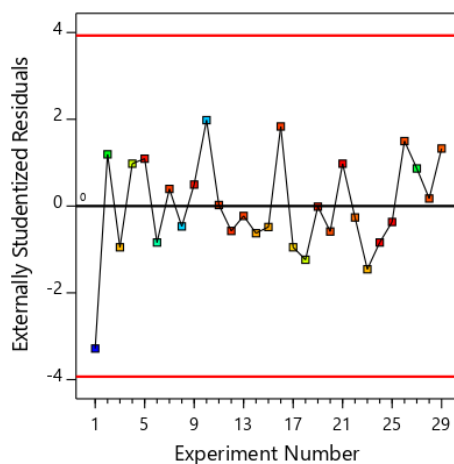

**Figure S3.** Graphical representation of the distribution of residues,  $r_s$  depending on the ordinal number of the experiment.

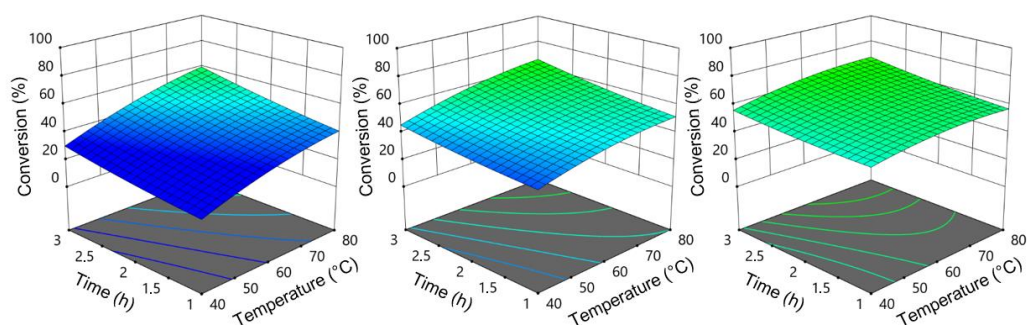

**Figure S4.** The 3D plots obtained when the molar ratio of the reactants was the lowest (4:1) and the value of the mass fraction of the catalyst was the lowest (1 %, left), medium (2 %, in the middle) and the highest (3 %, right)

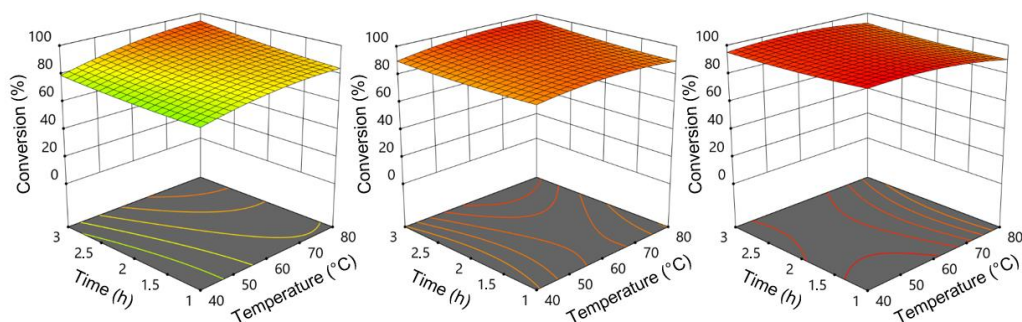

**Figure S5.** The 3D plots obtained when the molar ratio of the reactants was medium (7:1) and the value of the mass fraction of the catalyst was the lowest (1 %, left), medium (2 %, in the middle) and the highest (3 %, right).

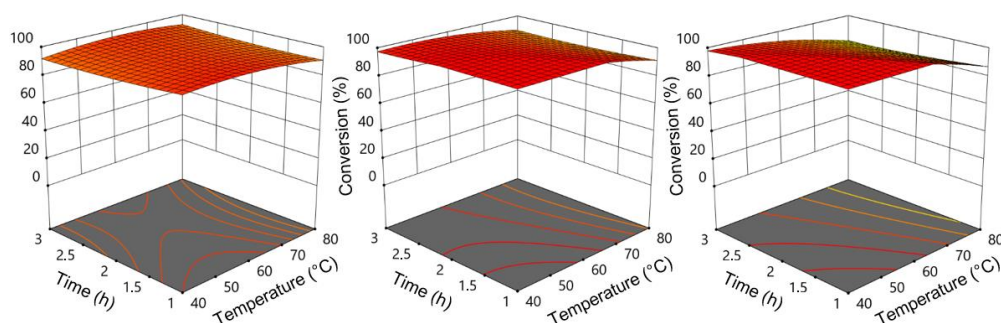

**Figure S6.** The 3D plots obtained when the molar ratio of the reactants was the highest (10:1) and the value of the mass fraction of the catalyst was the lowest (1 %, left), medium (2 %, in the middle) and the highest (3 %, right).

**Table S2.** Composition of the prepared blends (D – mineral diesel without additives, FAOCE – fatty acid octyl esters, O – 1-octanol).

| Sample name     | Diesel / vol% | FAOCE / vol% | 1-octanol / vol% |
|-----------------|---------------|--------------|------------------|
| D80FAOCE20      | 80.0          | 20.0         | 0.0              |
| D85FAOCE15      | 85.0          | 15.0         | 0.0              |
| D90FAOCE10      | 90.0          | 10.0         | 0.0              |
| D92.5FAOCE7.5   | 92.5          | 7.5          | 0.0              |
| D95FAOCE5       | 95.0          | 5.0          | 0.0              |
| D97.5FAOCE2.5   | 97.5          | 2.5          | 0.0              |
| D80FAOCE15O5    | 80.0          | 15.0         | 5.0              |
| D80FAOCE10O10   | 80.0          | 10.0         | 10.0             |
| D80FAOCE5O15    | 80.0          | 5.0          | 15.0             |
| D90FAOCE7.5O2.5 | 90.0          | 7.5          | 2.5              |
| D90FAOCE5O5     | 90.0          | 5.0          | 5.0              |
| D90FAOCE2.5O7.5 | 90.0          | 2.5          | 7.5              |

**Table S3.** The property results of diesel, 1-octanol, FAOCE and their blends.

| Blend      | Viscosity (mm <sup>2</sup> /s) | Density (kg/m <sup>3</sup> ) | CFPP (°C) | Wear scar diameter (μm) |
|------------|--------------------------------|------------------------------|-----------|-------------------------|
| D100       | 2.600                          | 826.3                        | -8        | 571                     |
| FAOCE100   | 4.613                          | 881.5                        | 0         | 190                     |
| D80FAOCE20 | 3.365                          | 836.9                        | -8        | 280                     |
| D85FAOCE15 | 3.163                          | 834.4                        | -7        | 230                     |
| D90FAOCE10 | 2.980                          | 831.8                        | -7        | 350                     |

|                      |       |       |     |     |
|----------------------|-------|-------|-----|-----|
| D92.5FAOCE7.5        | 2.883 | 830.7 | -6  | 350 |
| D95FAOCE5            | 2.802 | 829.3 | -7  | 310 |
| D97.5FAOCE2.5        | 2.703 | 828.2 | -7  | 400 |
| D80FAOCE15O5         | 3.164 | 834.2 | -7  | /   |
| D80FAOCE10O10        | 3.005 | 831.2 | -7  | 270 |
| D80FAOCE5O15         | 2.910 | 828.9 | -7  | /   |
| D90FAOCE7.5O2.52.847 |       | 830.4 | -7  | /   |
| D90FAOCE5O5          | 2.770 | 828.6 | -7  | 300 |
| D90FAOCE2.5O7.52.716 |       | 827.9 | -8  | /   |
| O100                 | 5.303 | 828.4 | -17 | 410 |

Representative figure for the differential scanning calorimetry analysis of the prepared blend is given in the Figure S7.

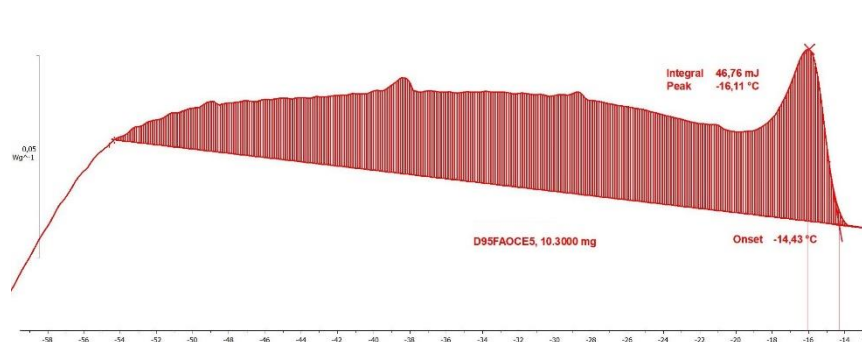

**Figure S7.** An example of the differential scanning calorimetry curve analysis.
